# Supplementary material for: Morphological adaptability through structural alterations in an AIE active novel chemosensor with Al(iii), Fe(iii), and gas phase/aqueous phase TNP recognition ability
Source: Royal Society of Chemistry journal article supplement (doi:10.1039/d4nj00303a), 2024-01-01
Supplement: d4nj00303a1.pdf [file d4nj00303a1.pdf]

**Morphological adaptability through structural alterations in AIE active novel chemosensor  
with Al(III), Fe(III), and gas phase/aqueous phase TNP recognition ability**

Pranabendu Das<sup>b</sup>, Manik Das<sup>a</sup>, Raju Biswas, Soumik Laha, Bidhan Chandra Samanta<sup>c</sup>, <sup>e</sup> Tithi Maity<sup>a\*</sup>

<sup>a</sup> Department of Chemistry, Prabhat Kumar College, Contai, Purba Medinipur, West Bengal, 721404, India

<sup>b</sup>Department of Chemistry, Indian Association for the Cultivation of Science, India

<sup>c</sup>Indian Institute of Chemical Biology, Jadavpur University, Kolkata, India

<sup>e</sup>Department of Chemistry, Mugberia Gangadhar Mahavidyalaya, Purba Medinipur, India

Email: [titlipkc2008@gmail.com](mailto:titlipkc2008@gmail.com)

| <b>Fig. No.</b> | <b>Index</b> | <b>Page</b> |
|-----------------|--------------|-------------|
|-----------------|--------------|-------------|

|                 |                                                                                                                                                                                                                                                                                                                           | <b>Number</b> |
|-----------------|---------------------------------------------------------------------------------------------------------------------------------------------------------------------------------------------------------------------------------------------------------------------------------------------------------------------------|---------------|
| <b>Fig. S1</b>  | Uv absorption spectra of <b>H<sub>2</sub>L</b>                                                                                                                                                                                                                                                                            | S5            |
| <b>Fig. S2</b>  | FTIR Spectrum of <b>H<sub>2</sub>L</b>                                                                                                                                                                                                                                                                                    | S5            |
| <b>Fig. S3</b>  | Mass Spectrum of <b>H<sub>2</sub>L</b>                                                                                                                                                                                                                                                                                    | S6            |
| <b>Fig. S4</b>  | Fluorescence spectra of <b>H<sub>2</sub>L</b> in different solvents from non-polar to protic solvents to investigate the ESIPT process                                                                                                                                                                                    | S6            |
| <b>Fig. S5</b>  | TEM image of the probe in 7:3 DMSO-water mixture                                                                                                                                                                                                                                                                          | S7            |
| <b>Fig. S6</b>  | Change of absorption spectra of <b>H<sub>2</sub>L</b> ( $2 \times 10^{-6}$ M) in different DMSO – H <sub>2</sub> O solvent mixtures.                                                                                                                                                                                      | S7            |
| <b>Fig. S7</b>  | DLS spectral analysis of <b>H<sub>2</sub>L</b>                                                                                                                                                                                                                                                                            | S8            |
| <b>Fig. S8</b>  | Change of absorption spectra of <b>H<sub>2</sub>L</b> as a function of time (a) in DMSO – H <sub>2</sub> O (9:1 v/v) solvent (b) in AIEE solvent                                                                                                                                                                          | S8            |
| <b>Fig. S9</b>  | Change of Emission intensity of <b>H<sub>2</sub>L</b> and <b>H<sub>2</sub>L</b> – Al(III) adduct as a function of pH in DMSO – H <sub>2</sub> O (9:1 v/v) HEPES buffer solution (b) Change of Emission intensity of <b>H<sub>2</sub>L</b> and <b>H<sub>2</sub>L</b> – Fe(III) adduct as a function of pH in AIEE solution | S9            |
| <b>Fig. S10</b> | Change of emission intensity of <b>H<sub>2</sub>L</b> ( $3 \times 10^{-6}$ M) in the presence of several cations ( $1 \times 10^{-5}$ M) (a) in DMSO – H <sub>2</sub> O (9:1 v/v) HEPES buffer media at pH 7.4 upon excitation at 370 nm (b) DMSO – H <sub>2</sub> O (3:7 v/v) AIEE media upon excitation at 375 nm       | S9            |
| <b>Fig. S11</b> | The plot of Emission intensity vs concentration of metal ion to determine the LOD value for (a) <b>H<sub>2</sub>L</b> – Al(III) and (b) <b>H<sub>2</sub>L</b> – Fe(III) adducts                                                                                                                                           | S10           |
| <b>Fig. S12</b> | (a) Stern-Volmer plot in determining quenching constant after the introduction of Fe(III) to <b>H<sub>2</sub>L</b> . Binding constant determination plot for (b) <b>H<sub>2</sub>L</b> – Al(III) adduct and (c) <b>H<sub>2</sub>L</b> – Fe(III) adduct from fluorescence spectral data.                                   | S10           |

|                 |                                                                                                                                                                                                                           |     |
|-----------------|---------------------------------------------------------------------------------------------------------------------------------------------------------------------------------------------------------------------------|-----|
| <b>Fig. S13</b> | reversibility experiment of <b>H<sub>2</sub>L</b> (a) by alternative addition of Al(III) and NaF in DMSO – H <sub>2</sub> O (9:1 v/v) HEPES buffer media (b) by alternative addition of Fe(III) and SHMP in AIEE solvent. | S11 |
| <b>Fig. S14</b> | Change of Emission intensity of <b>H<sub>2</sub>L</b> – Al(III)/Fe(III) adduct in the presence of several competitive cations in (a) DMSO – H <sub>2</sub> O (9:1 v/v) HEPES buffer solution (b) AIEE solvent             | S11 |
| <b>Fig. S15</b> | Change of fluorescence spectra of <b>H<sub>2</sub>L</b> after separative addition of different NACs in AIEE solvent.                                                                                                      | S12 |
| <b>Fig. S16</b> | LOD determination plot for TNP from the linear fitting plot of Emission intensity vs concentration of TNP                                                                                                                 | S12 |
| <b>Table S1</b> | Sensing parameters of several literatures reported Schiff base probe with cations or TNP sensing ability                                                                                                                  | S13 |
| <b>Fig. S17</b> | Time-resolved fluorescence decay of probe <b>H<sub>2</sub>L</b> in the presence and absence of Fe (III) and TNP                                                                                                           | S16 |
| <b>Table S2</b> | Different parameter values during lifetime experiments of <b>H<sub>2</sub>L</b> in the presence and absence of Fe(III) and TNP                                                                                            | S16 |
| <b>Fig. S18</b> | MASS spectra of <b>H<sub>2</sub>L</b> – Al(III) adduct                                                                                                                                                                    | S17 |
| <b>Fig. S19</b> | MASS spectra of <b>H<sub>2</sub>L</b> – Fe(III) adduct                                                                                                                                                                    | S17 |
| <b>Fig. S20</b> | Job's plot for the determination of 1:1 stoichiometry complexation of <b>H<sub>2</sub>L</b> and (a) Al(III) (b) Fe(III) and (c) TNP                                                                                       | S18 |
| <b>Fig. S21</b> | DFT optimized electronic structure of (a) <b>H<sub>2</sub>L</b> (b) <b>H<sub>2</sub>L</b> - Al(III) Complex (c) <b>H<sub>2</sub>L</b> - Fe(III) Complex (d) <b>H<sub>2</sub>L</b> - PA adduct                             | S18 |
| <b>Fig. S22</b> | HOMO-LUMO energy gap for <b>H<sub>2</sub>L</b> , <b>H<sub>2</sub>L</b> -Al(III), <b>H<sub>2</sub>L</b> -Fe(III), <b>H<sub>2</sub>L</b> -TNP                                                                               | S19 |
| <b>Fig. S23</b> | DFT optimized electronic spectra of the Probe and the probe analyte complexes                                                                                                                                             | S19 |
| <b>Fig. S24</b> | Frontier Molecular Orbital images of the probe <b>H<sub>2</sub>L</b> and the Probe analyte complexes                                                                                                                      | S20 |
| <b>Table S3</b> | Selected Bond distance and Bond angles of <b>H<sub>2</sub>L</b> , <b>H<sub>2</sub>L</b> -Al(III) complex, <b>H<sub>2</sub>L</b> -Fe(III) complex and <b>H<sub>2</sub>L</b> -TNP adduct in the                             | S20 |

|                   |                                                                                                                                                                                                                                  |     |
|-------------------|----------------------------------------------------------------------------------------------------------------------------------------------------------------------------------------------------------------------------------|-----|
|                   | ground state geometry                                                                                                                                                                                                            |     |
| <b>Table S4</b>   | Molecular Orbital involved the Major Electronic Transitions with Osc. Strength of <b>H<sub>2</sub>L</b> , <b>H<sub>2</sub>L</b> – Al(III) Complex, <b>H<sub>2</sub>L</b> – Fe(III) Complex and <b>H<sub>2</sub>L</b> -TNP adduct | S21 |
| <b>Table S5</b>   | Measured amount of Al(III) concentration in market-available drug samples along with a comparison with HPLC method                                                                                                               | S21 |
| <b>References</b> |                                                                                                                                                                                                                                  | S22 |

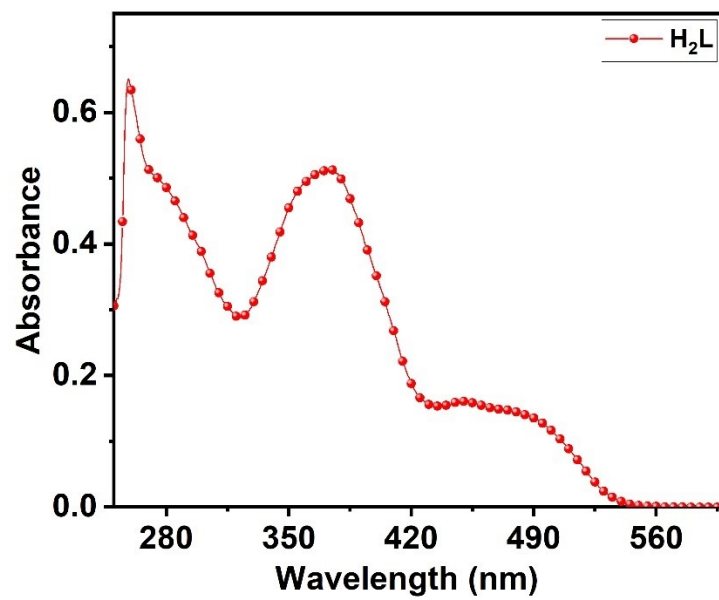

Fig. S1: Uv absorption spectra of the probe  $H_2L$

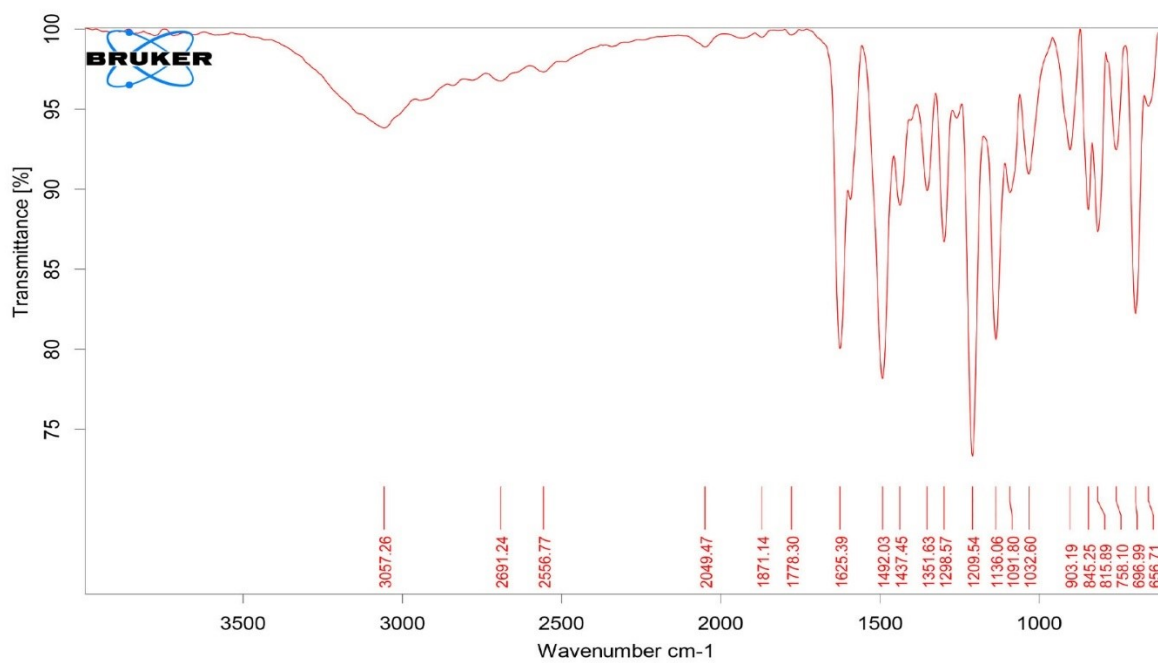

Fig. S2: FTIR spectra of  $H_2L$

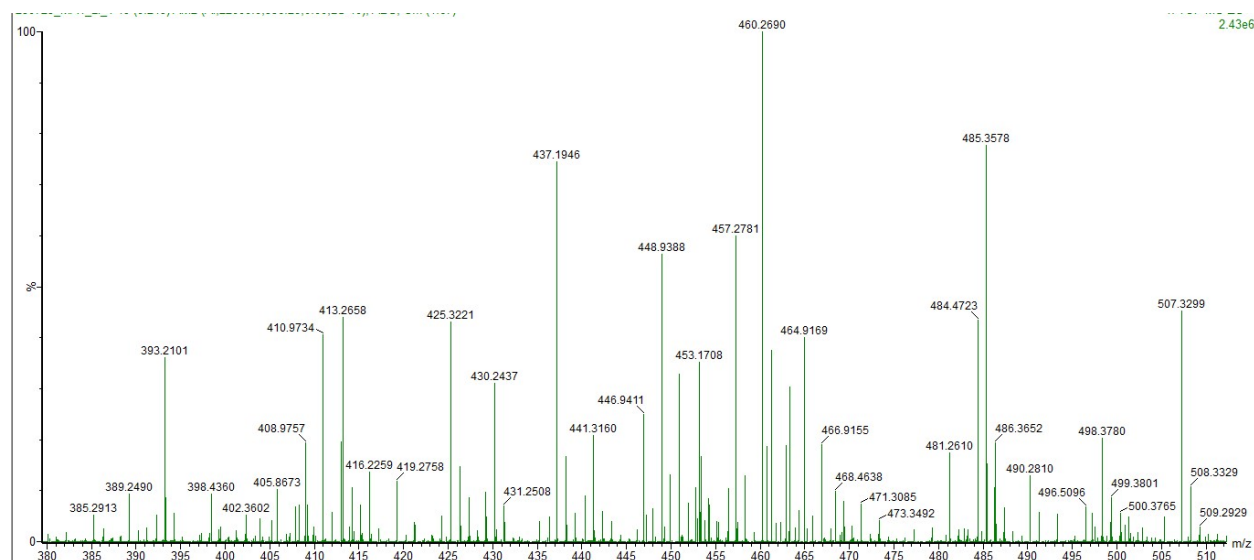

**Fig. S3:** Mass Spectra of  $H_2L$

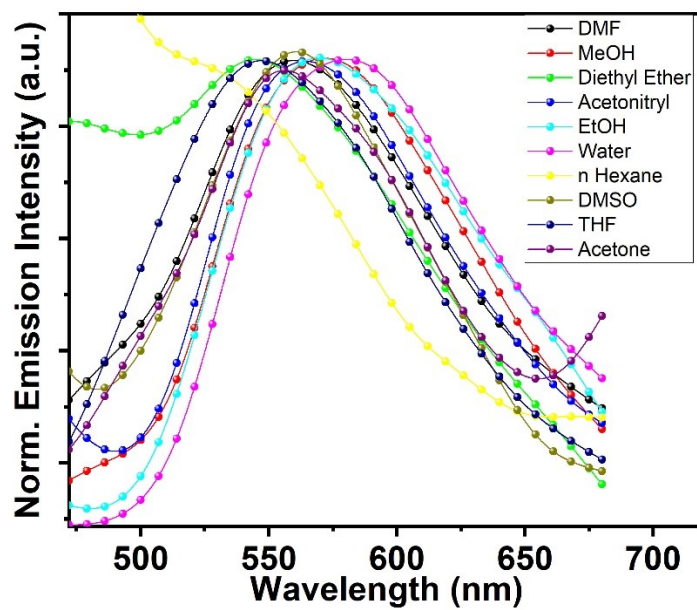

**Fig. S4:** Fluorescence spectra of  $H_2L$  in different solvents from non-polar to protic solvents to investigate the ESIPT process

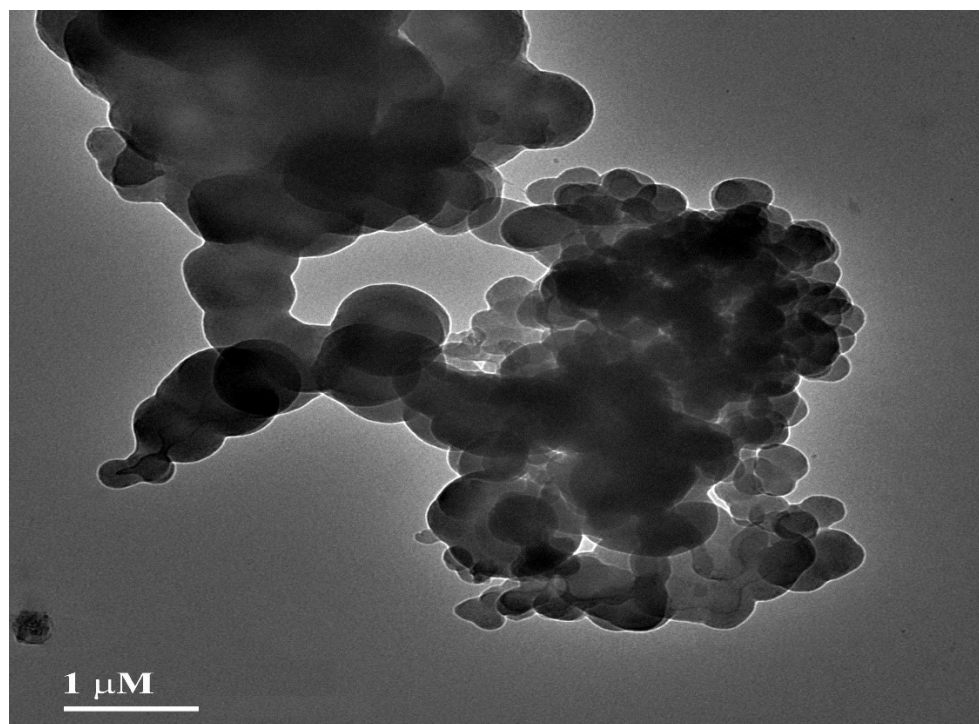

Fig. S5: TEM image of the probe in 7:3 DMSO-water mixture

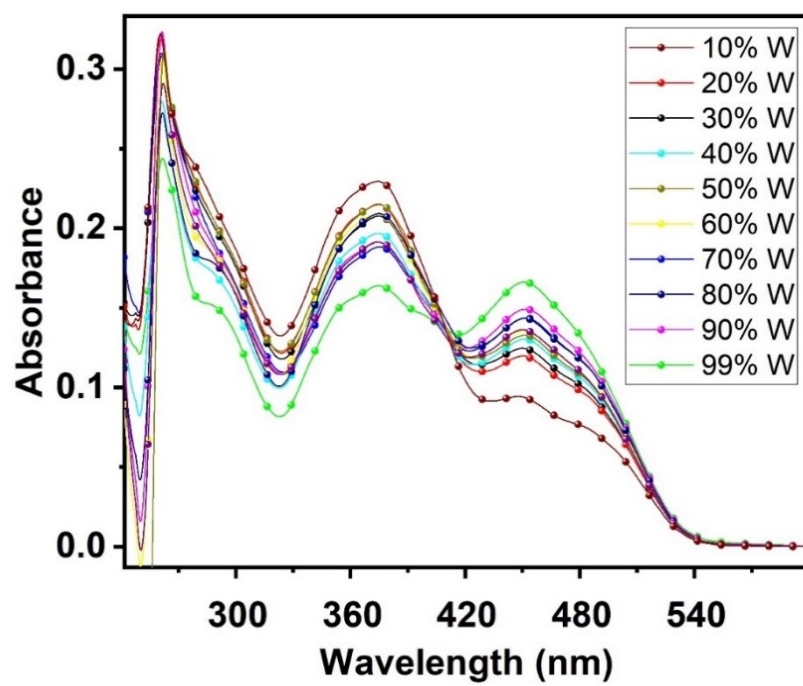

Fig. S6: Change of absorption spectra of H<sub>2</sub>L ( $2 \times 10^{-6}$  M) in different DMSO: H<sub>2</sub>O mixtures.

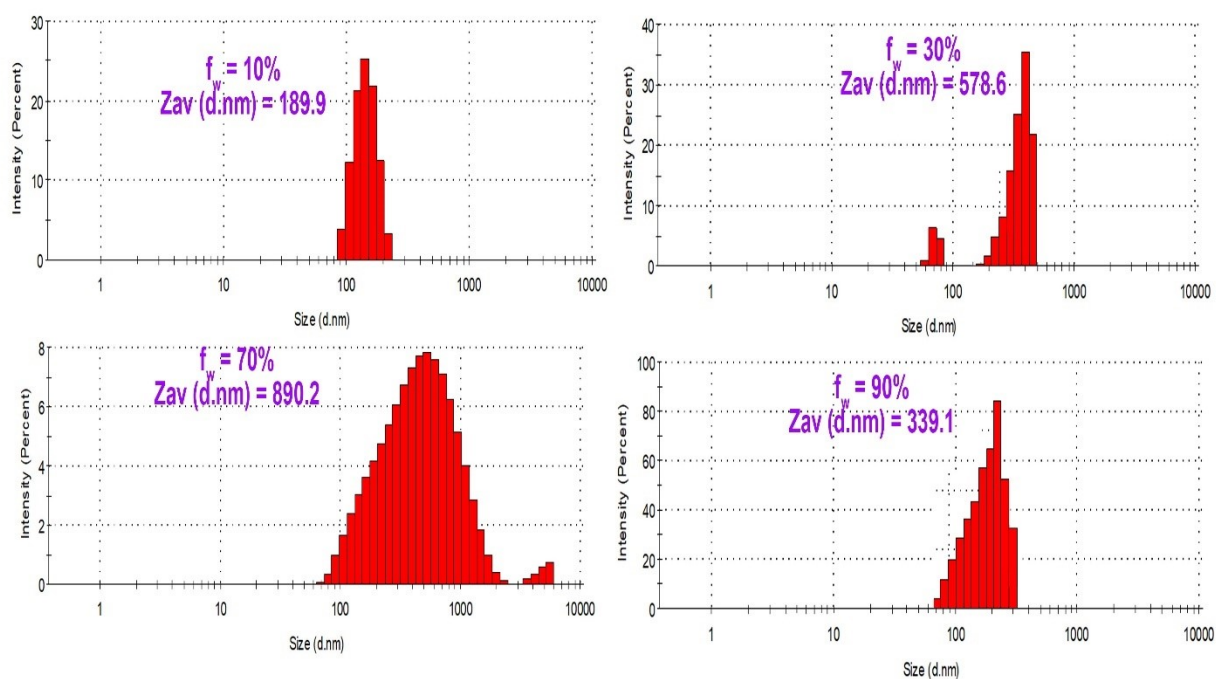

**Fig. S7:** DLS spectral analysis of  $H_2L$

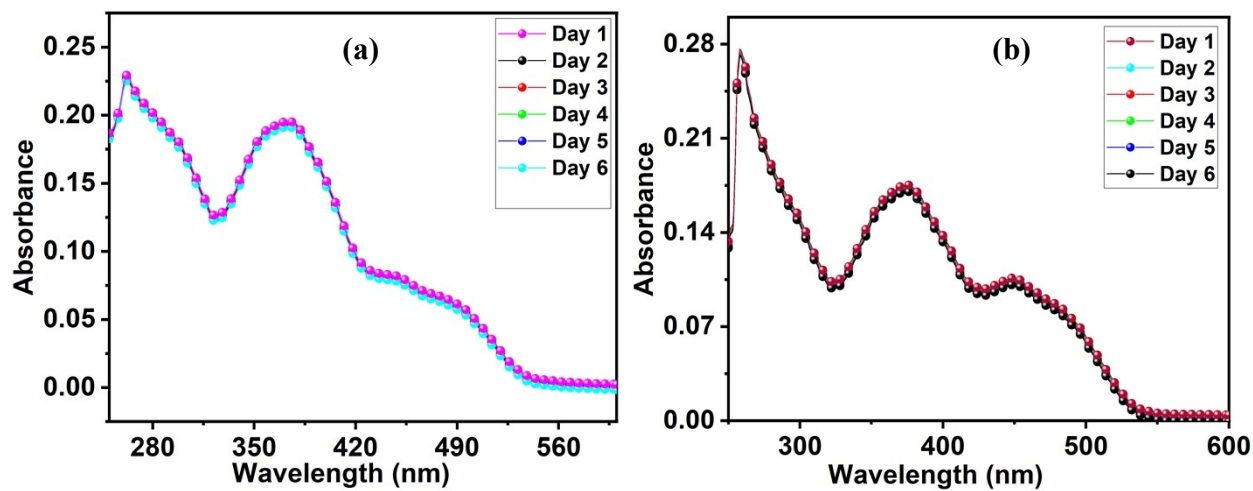

**Fig. S8:** Change of absorption spectra of  $H_2L$  as a function of time (a) in DMSO –  $H_2O$  (9:1 v/v) solvent (b) in AIEE solvent



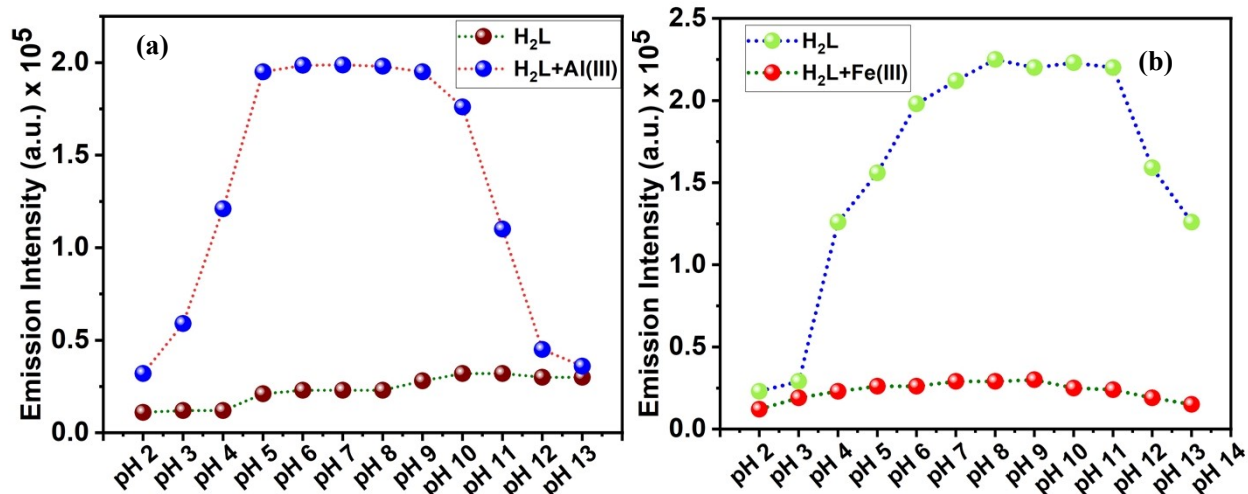

**Fig. S9:** (a) Change of Emission intensity of  $\text{H}_2\text{L}$  and  $\text{H}_2\text{L} - \text{Al(III)}$  adduct as a function of pH in  $\text{DMSO} - \text{H}_2\text{O}$  (9:1 v/v) HEPES buffer solution (b) Change of Emission intensity of  $\text{H}_2\text{L}$  and  $\text{H}_2\text{L} - \text{Fe(III)}$  adduct as a function of pH in AIEE solution

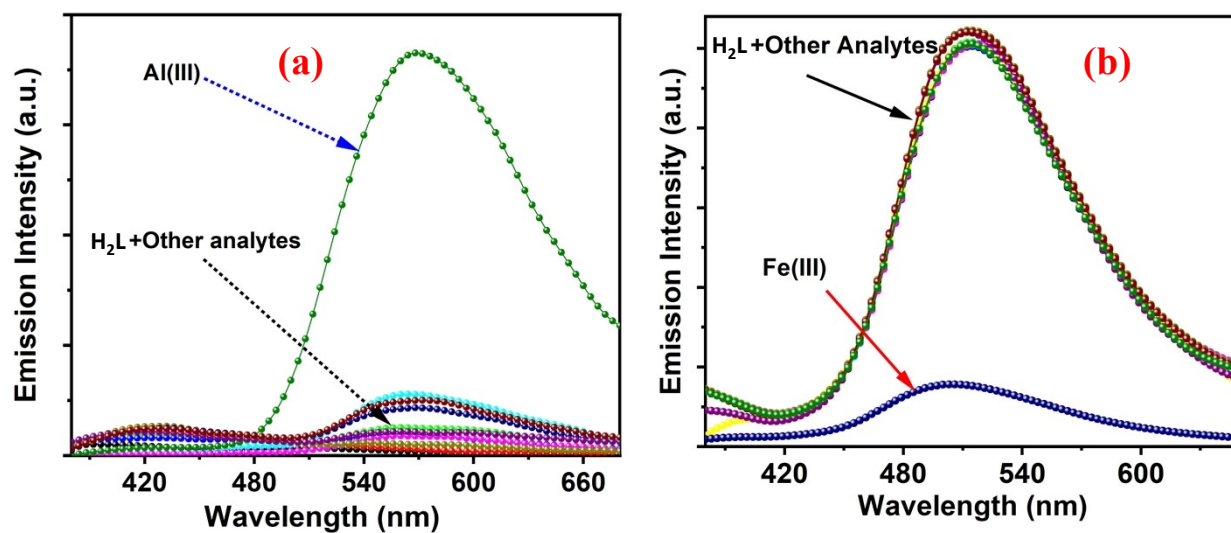

**Fig. S10:** Change of emission intensity of  $\text{H}_2\text{L}$  ( $3 \times 10^{-6}$  M) in the presence of several cations ( $1 \times 10^{-5}$  M) (a) in  $\text{DMSO} - \text{H}_2\text{O}$  (9:1 v/v) HEPES buffer media at pH 7.4 upon excitation at 370 nm (b)  $\text{DMSO} - \text{H}_2\text{O}$  (3:7 v/v) AIEE media upon excitation at 375 nm

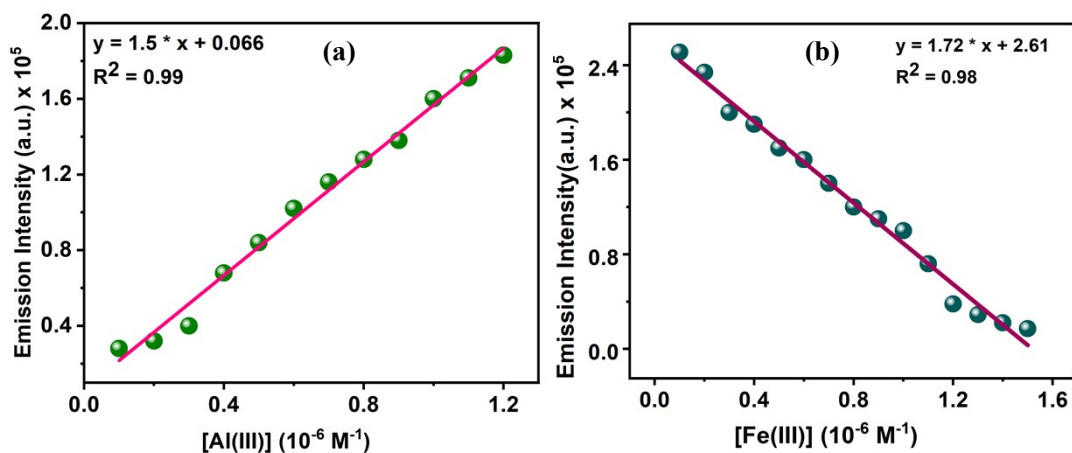

**Fig. S11:** Plot of Emission intensity vs concentration of metal ion to determine the LOD value for (a)  $\text{H}_2\text{L} - \text{Al(III)}$  and (b)  $\text{H}_2\text{L} - \text{Fe(III)}$  adducts

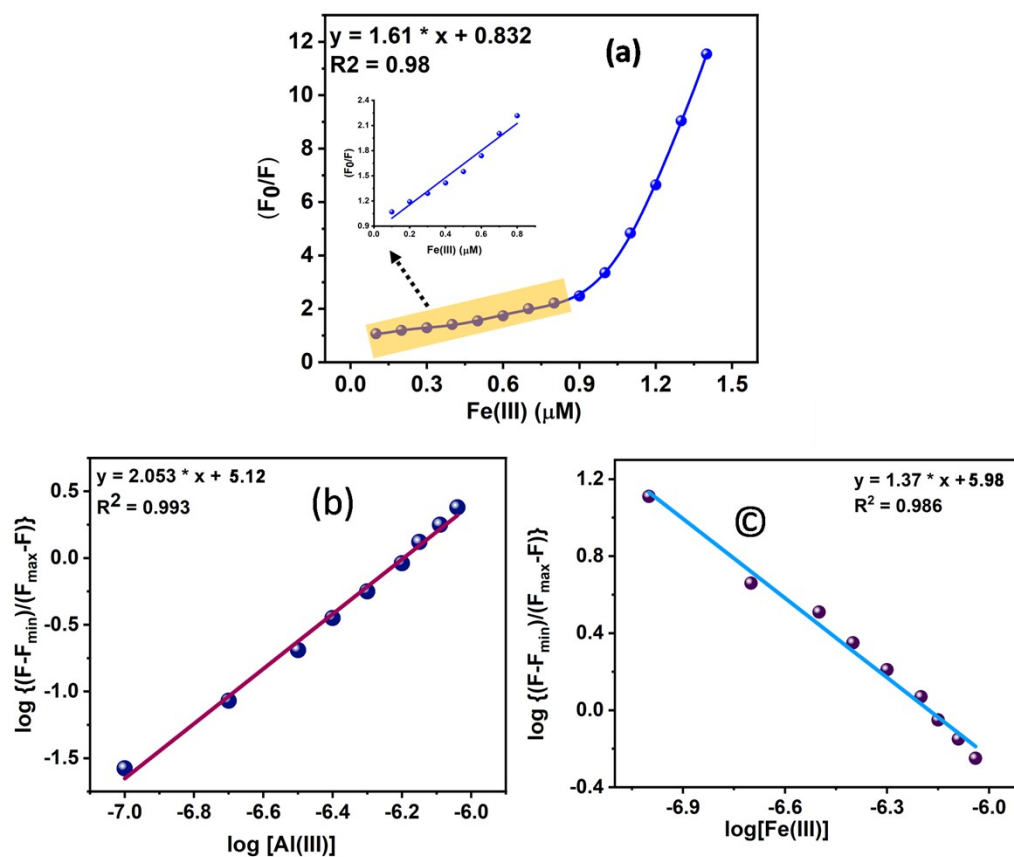

**Fig. S12:** (a) Stern-Volmer plot in determining quenching constant after the introduction of  $\text{Fe(III)}$  to  $\text{H}_2\text{L}$ . Binding constant determination plot for (b)  $\text{H}_2\text{L} - \text{Al(III)}$  adduct and (c)  $\text{H}_2\text{L} - \text{Fe(III)}$  adduct from fluorescence spectral data.

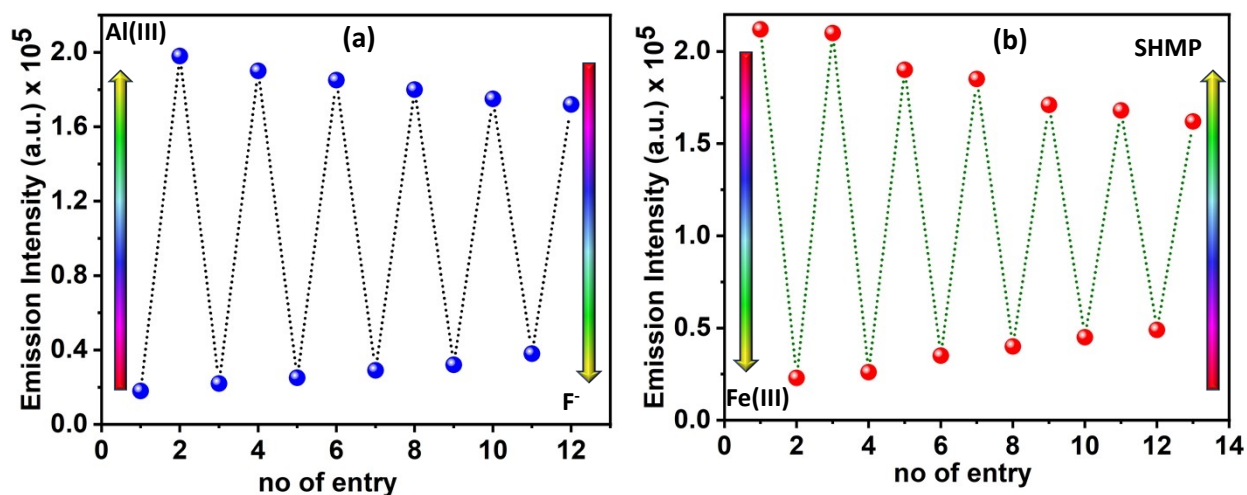

**Fig. S13:** reversibility experiment of  $H_2L$  (a) by alternative addition of Al(III) and NaF in DMSO –  $H_2O$  (9:1 v/v) HEPES buffer media (b) by alternative addition of Fe(III) and SHMP in AIEE solvent.

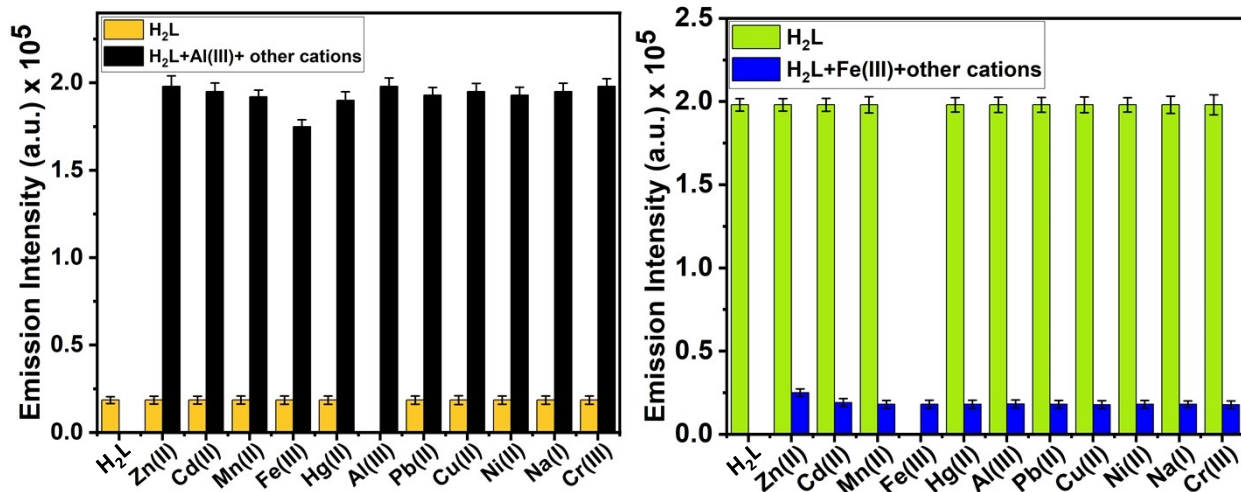

**Fig. S14:** Change of Emission intensity of  $H_2L$  – Al(III)/Fe(III) adduct in the presence of several competitive cations in (a) DMSO –  $H_2O$  (9:1 v/v) HEPES buffer solution (b) AIEE solvent

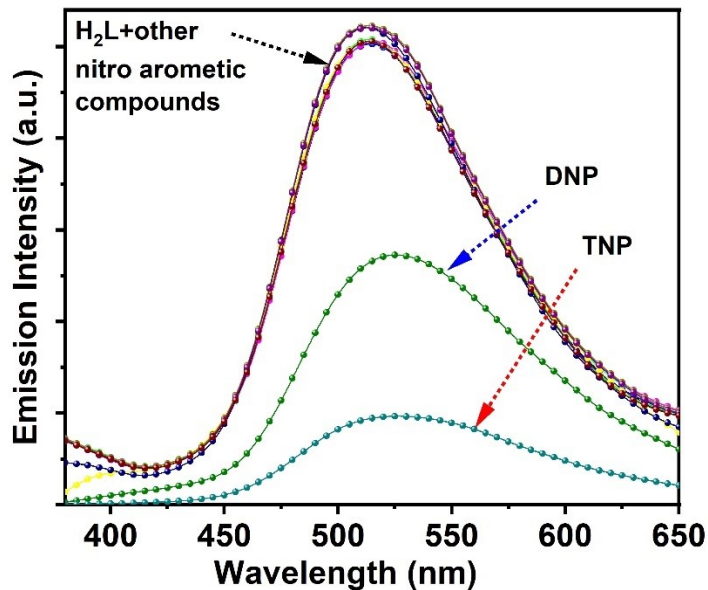

**Fig. S15:** Change of fluorescence spectra of H<sub>2</sub>L after separate addition of different NACs in AIEE solvent.

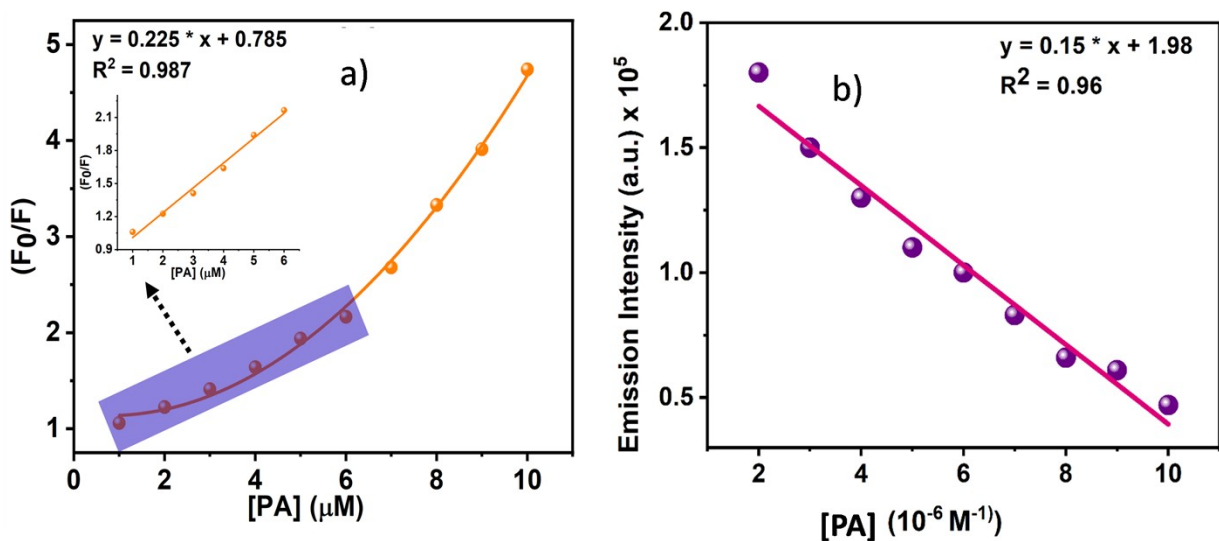

**Fig. S16:** a) Stern-Volmer plot in determining quenching constant after the introduction of picric acid to H<sub>2</sub>L. b) LOD determination plot for TNP from the linear fitting plot of Emission intensity vs concentration of TNP

**Table 1:** Sensing parameters of several literature reported Schiff base probe with cations or TNP sensing ability

| Sl No | Probe                                                                               | Ion detection    | Solvent (v/v)               | LOD (M)                                        | Sensing Technique                   | Application               | References |
|-------|-------------------------------------------------------------------------------------|------------------|-----------------------------|------------------------------------------------|-------------------------------------|---------------------------|------------|
| 01    | 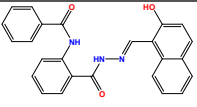   | Al(III)          | MeOH-H <sub>2</sub> O (9:1) | $1.68 \times 10^{-9}$                          | Fluorometric                        | Paper Strip, Cell imaging | 1          |
| 02    |    | Al(III)          | MeOH                        | $1.81 \times 10^{-8}$                          | Fluorometric                        | No                        | 2          |
| 03    |    | Zn(II), Al(III)  | MeOH                        | $3.15 \times 10^{-7}$<br>$2.98 \times 10^{-7}$ | Fluorometric                        | No                        | 3          |
| 04    |  | Fe(III)          | H <sub>2</sub> O            | $7.6 \times 10^{-5}$                           | Fluorometric                        | Real water                | 4          |
| 05    |  | Fe(III)          | MeOH-H <sub>2</sub> O (1:1) | $1.28 \times 10^{-8}$                          | Fluorometric                        | Cell Imaging, Real water  | 5          |
| 06    |  | Al(III), Fe(II)  | H <sub>2</sub> O            | $3.98 \times 10^{-5}$<br>$1.85 \times 10^{-5}$ | Colourimetric And Fluorometric both | No                        | 6          |
| 07    |  | Al(III), Fe(III) | MeOH-H <sub>2</sub> O (1:1) | $1.1 \times 10^{-8}$<br>$1.9 \times 10^{-8}$   | Colourimetric Fluorometric          | Paper strip               | 7          |

|    |                                                                                     |                                             |                                        |                                                                                                              |                                                                            |                                    |    |
|----|-------------------------------------------------------------------------------------|---------------------------------------------|----------------------------------------|--------------------------------------------------------------------------------------------------------------|----------------------------------------------------------------------------|------------------------------------|----|
| 08 | 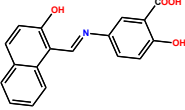   | Cu(II),<br>Cr(III)<br>Al(III),<br>Fe(III)   | DMF-<br>H <sub>2</sub> O<br><br>(1:1)  | 4.65×10 <sup>-7</sup><br><br>3.37×10 <sup>-7</sup><br><br>3.58×10 <sup>-7</sup><br><br>4.89×10 <sup>-7</sup> | Colourimetric<br><br>Colourimetric<br><br>Fluorometric<br><br>Fluorometric | No                                 | 8  |
| 09 |    | Al(III)<br>Fe(III)                          | THF,<br>MeOH<br>,<br>H <sub>2</sub> O  | 4.38×10 <sup>-9</sup><br><br>6.74×10 <sup>-7</sup>                                                           | Colourimetric<br><br>Fluorometric<br><br>both                              | Logic gate                         | 9  |
| 10 |    | Al(III)                                     | MeCN<br>-H <sub>2</sub> O<br><br>(2:8) | 3.0×10 <sup>-5</sup>                                                                                         | Colourimetric<br><br>Fluorometric<br><br>both                              | Cell<br>imaging                    | 10 |
| 11 |  | Al(III),<br>Cr(III)<br>Fe(III),<br>Cu(II)   | MeOH<br>-H <sub>2</sub> O<br><br>(9:1) | 2.27×10 <sup>-6</sup><br><br>1.29×10 <sup>-6</sup><br><br>1.75×10 <sup>-6</sup><br><br>1.21×10 <sup>-6</sup> | Fluorometric<br><br>Fluorometric<br><br>Fluorometric                       | Cell<br>imaging<br><br>Paper strip | 11 |
| 12 |  | Hg(II),<br>TNP (not<br>in vapour<br>state)  | EtOH-<br>H <sub>2</sub> O<br><br>(2:8) | 2.43×10 <sup>-8</sup><br><br>8.37×10 <sup>-8</sup>                                                           | Fluorometric                                                               | Cell<br>imaging                    | 12 |
| 13 |  | Al(III),<br>TNP (not<br>in vapour<br>state) | H <sub>2</sub> O                       | 1.13×10 <sup>-8</sup><br><br>2.01×10 <sup>-8</sup>                                                           | Fluorometric                                                               | Cell<br>imaging                    | 13 |

|    |                                                                                     |                                                       |                                       |                                                                           |                                       |                                                   |                 |
|----|-------------------------------------------------------------------------------------|-------------------------------------------------------|---------------------------------------|---------------------------------------------------------------------------|---------------------------------------|---------------------------------------------------|-----------------|
| 14 | 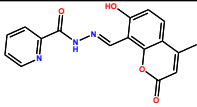   | Al(III),<br>TNP(not<br>in vapour<br>state)            | DMS<br>O-H <sub>2</sub> O<br>(1:9)    | $6.99 \times 10^{-9}$<br>$1.67 \times 10^{-6}$                            | Fluorometric                          | Logic gate                                        | 14              |
| 15 | Ni – MOF                                                                            | TNP (not<br>in vapour<br>state)                       | MeCN<br>,<br>Gas                      | $2.9 \times 10^{-5}$                                                      | Fluorometric                          | N <sub>2</sub><br>Adsorption                      | 15              |
| 16 | Dy – MOF                                                                            | TNP(not<br>in vapour<br>state)                        | H <sub>2</sub> O,<br>Gas              | $1.25 \times 10^{-5}$                                                     | Fluorometric                          |                                                   | 16              |
| 17 |    | TNP(not<br>in vapour<br>state)                        | DMF                                   | $6.9 \times 10^{-8}$                                                      | Fluorometric                          | Portable<br>device                                | 17              |
| 18 |   | TNP(not<br>in vapour<br>state)                        | MeCN                                  | $5.5 \times 10^{-9}$                                                      | Fluorometric                          | Paper Strip                                       | 18              |
| 19 |  | TNP(not<br>in vapour<br>state)                        | Gas                                   | $9.8 \times 10^{-10}$                                                     | Colourimetric<br>Fluorometric<br>both | Paper strip                                       | 19              |
| 20 |  | Al(III),<br>Fe(II),<br>TNP(not<br>in vapour<br>state) | DMS<br>O-<br>H <sub>2</sub> O,<br>Gas | $6.02 \times 10^{-9}$ ,<br>$7.5 \times 10^{-9}$ ,<br>$6.0 \times 10^{-8}$ | Colourimetric<br>Fluorometric<br>both | Al(III)<br>detection<br>and<br>quantificati<br>on | Present<br>Work |

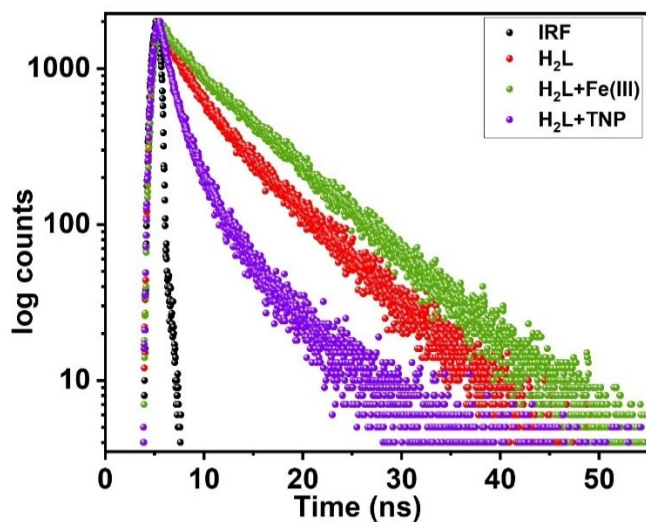

**Fig. S17:** Time-resolved fluorescence decay of probe  $\text{H}_2\text{L}$  in the presence and absence of Fe (III) and TNP

**Table S2:** Different parameter values during lifetime experiments of  $\text{H}_2\text{L}$  in the presence and absence of Fe(III) and TNP

| Sample                                                                    | $\tau_1$ | $\tau_2$ | $\alpha_1$ | $\alpha_2$ | $\chi^2$ | $\tau_{av}$ |
|---------------------------------------------------------------------------|----------|----------|------------|------------|----------|-------------|
| $\text{H}_2\text{L}$ (10 $\mu\text{M}$ )                                  | 1.35     | 7.62     | 0.318      | 0.681      | 1.146    | 5.618       |
| $\text{H}_2\text{L}$ (10 $\mu\text{M}$ ) +<br>Fe(III) (10 $\mu\text{M}$ ) | 1.95     | 7.04     | 0.586      | 0.414      | 1.08     | 4.05        |
| $\text{H}_2\text{L}$ (10 $\mu\text{M}$ ) +<br>TNP                         | 1.142    | 4.64     | 0.424      | 0.575      | 1.154    | 3.15        |



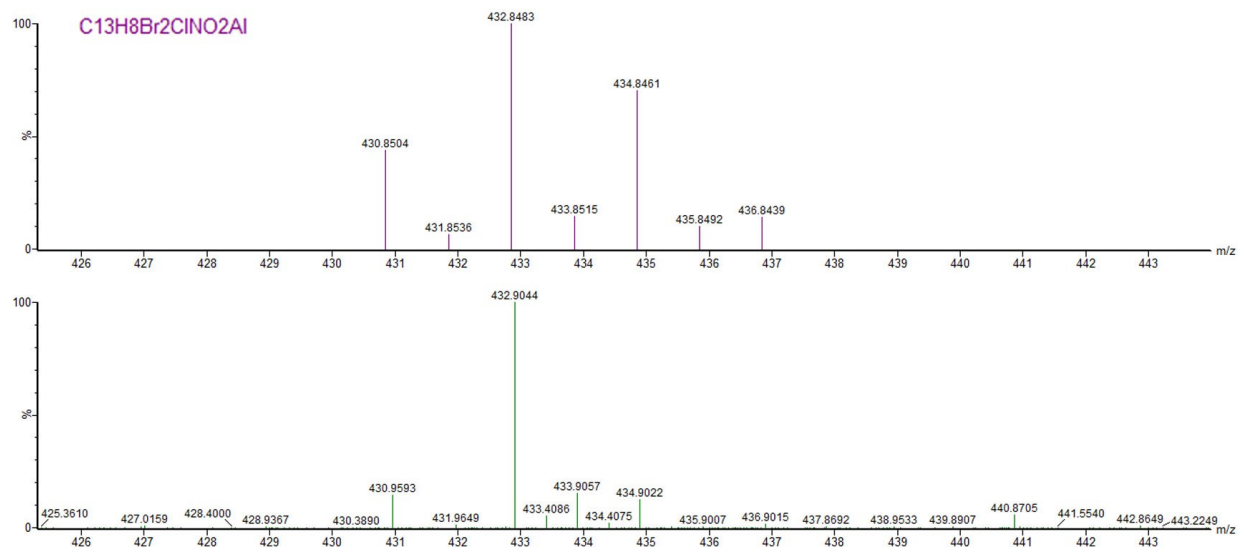

**Fig. S18:** MASS spectra of H<sub>2</sub>L – Al(III) adduct

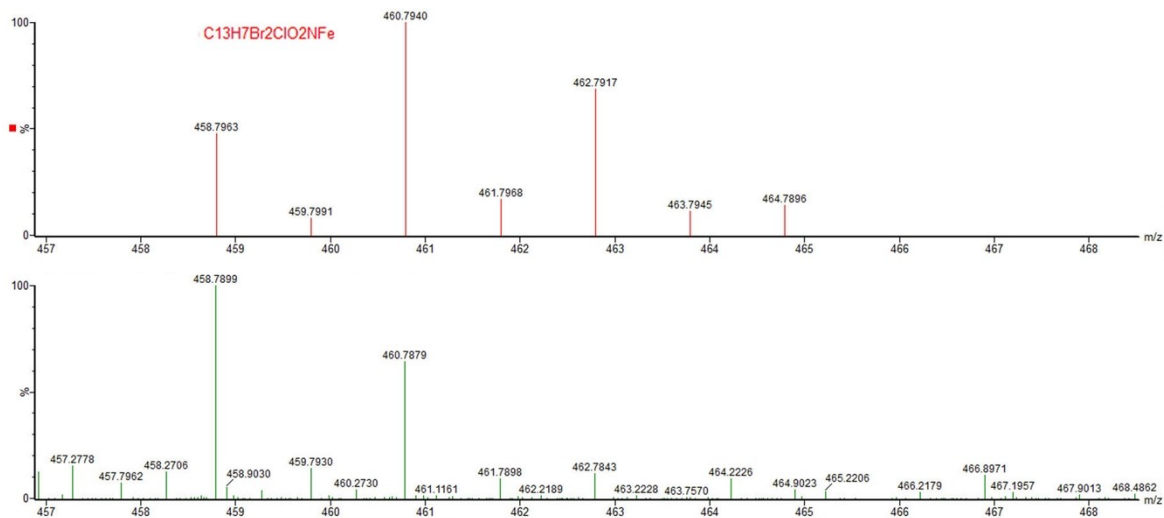

**Fig. S19:** MASS spectra of H<sub>2</sub>L – Fe(III) adduct

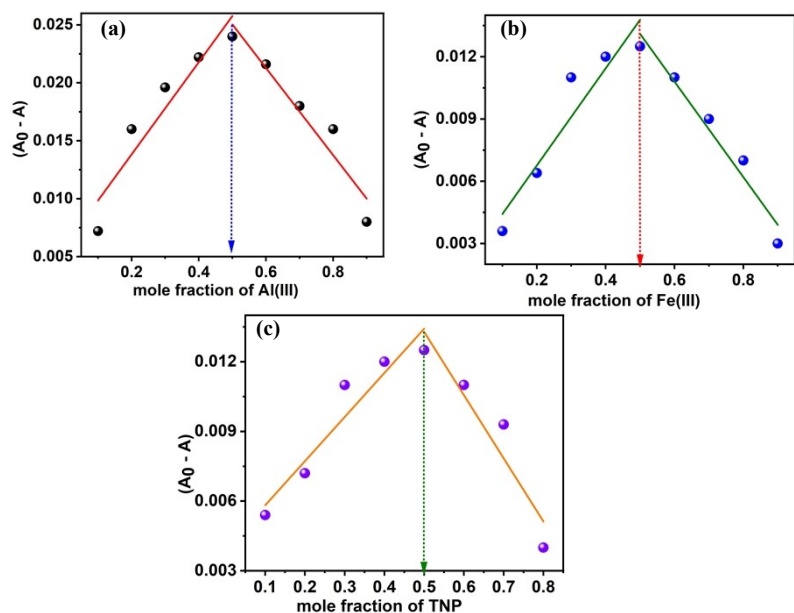

**Fig. S20:** Job's plot for the determination of 1:1 stoichiometry complexation of  $H_2L$  and (a)  $Al(III)$  (b)  $Fe(III)$  and (c) TNP

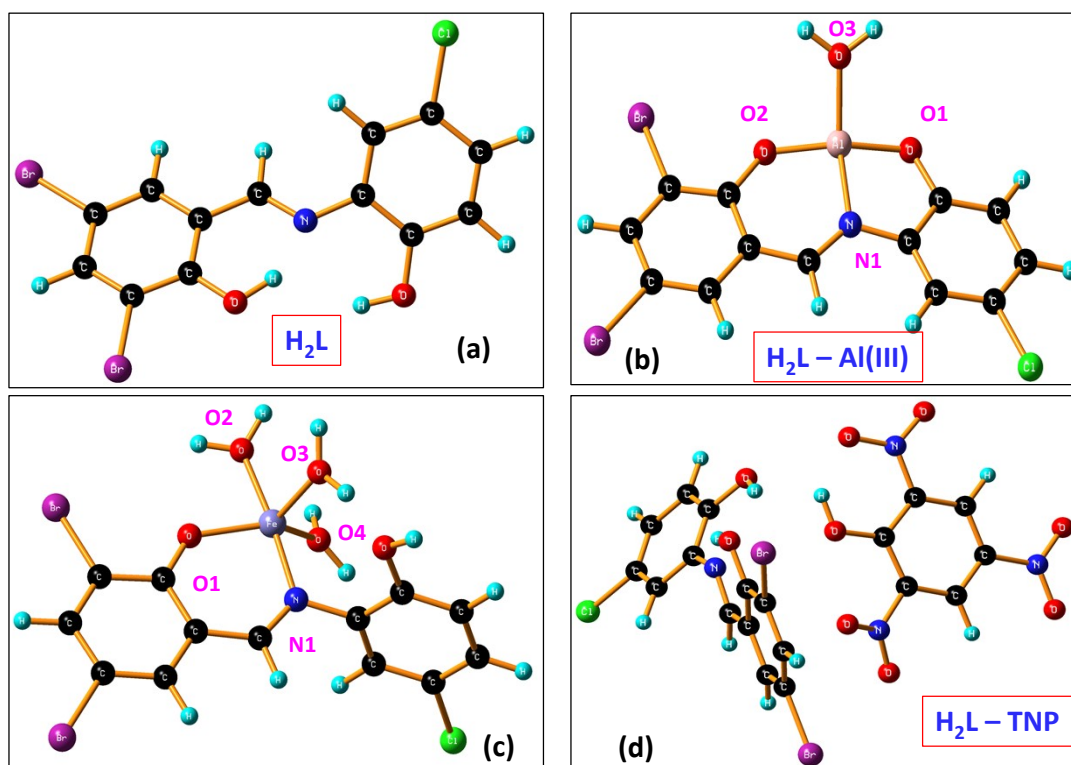

**Fig. S21:** DFT optimized electronic structure of (a)  $H_2L$  (b)  $H_2L - Al(III)$  Complex (c)  $H_2L - Fe(III)$  Complex (d)  $H_2L - TNP$  adduct

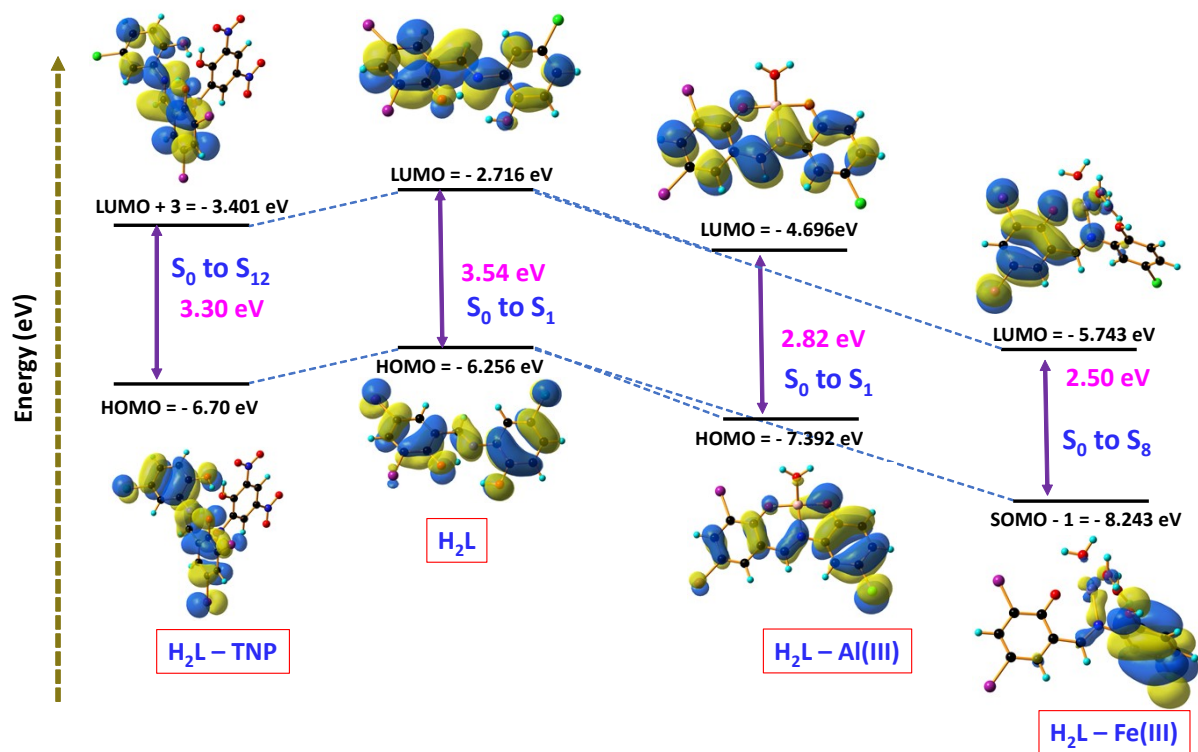

Fig. S22: HOMO-LUMO energy gap for  $H_2L$ ,  $H_2L-Al(III)$ ,  $H_2L-Fe(III)$ ,  $H_2L-TNP$

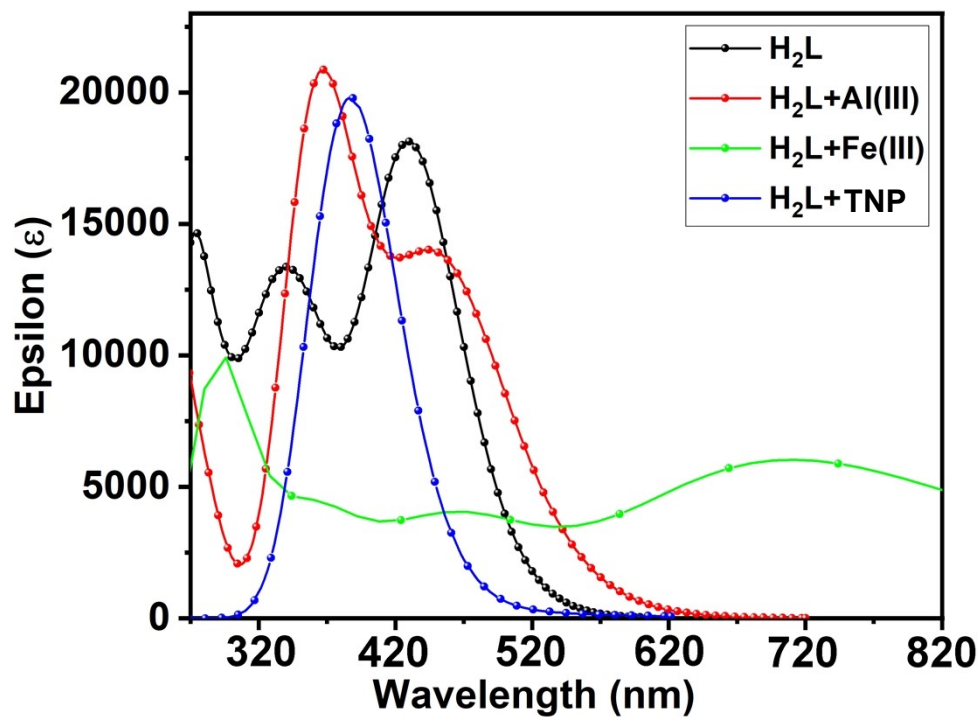

Fig. S23: DFT optimized electronic spectra of the Probe and the probe analyte complexes

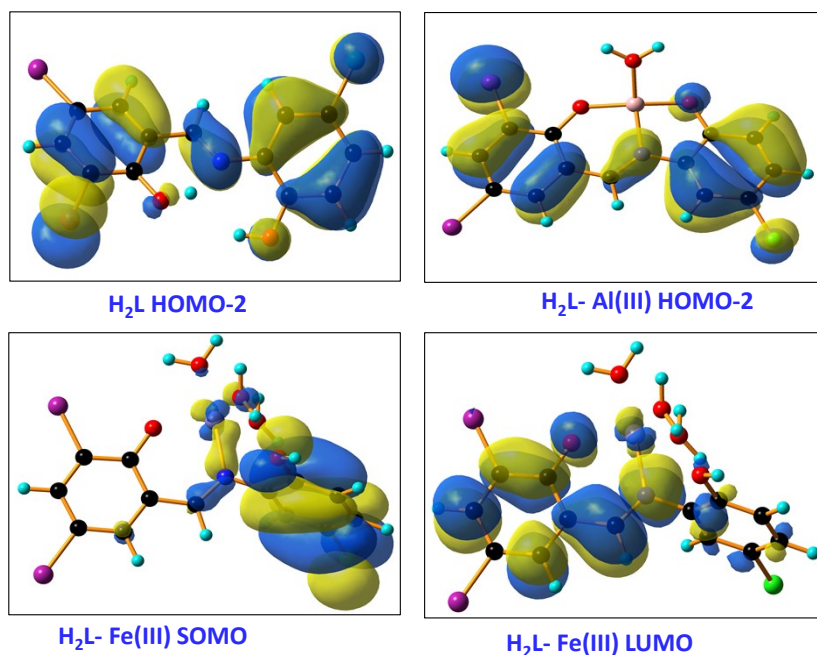

**Fig. S24:** Frontier Molecular Orbital images of the probe  $\text{H}_2\text{L}$  and the Probe analyte complexes

**Table S3:** Selected Bond distance and Bond angles of  $\text{H}_2\text{L}$ ,  $\text{H}_2\text{L}$ -Al(III) complex,  $\text{H}_2\text{L}$ -Fe(III) complex and  $\text{H}_2\text{L}$ -TNP adduct in the ground state geometry

| compounds                                                                 | Bond distance(Å) |            | Bond angle (degree) |        |
|---------------------------------------------------------------------------|------------------|------------|---------------------|--------|
|                                                                           |                  |            |                     |        |
| $\text{H}_2\text{L}$ -Al(III) complex<br>(Distorted Tetrahedral)          | Al-O1(L)         | 1.785      | O1- Al -N1          | 88.30  |
|                                                                           | Al-O2(L)         | 1.757      | O1- Al -O2          | 154.93 |
|                                                                           | Al-N1            | 1.932      | O3- Al -N1          | 138.32 |
|                                                                           | Al - O3(W)       | 1.854      | O3- Al -O2          | 96.55  |
|                                                                           |                  |            | O3- Al -O1          | 97.18  |
|                                                                           |                  |            | O2- Al -N1          | 95.20  |
| $\text{H}_2\text{L}$ -Fe(III) complex<br>(Distorted Square<br>pyramidal ) | Fe-N1            | 1.966      | N1- Fe -O1          | 92.22  |
|                                                                           | Fe-O1            | 1.940      | N1- Fe -O2          | 174.95 |
|                                                                           | Fe-O2            | 1.989      | N1- Fe -O3          | 93.45  |
|                                                                           | Fe-O3            | 1.984      | N1- Fe -O4          | 94.82  |
|                                                                           | Fe -O4           | 2.00       | O1- Fe -O2          | 83.63  |
|                                                                           |                  |            | O1- Fe -O3          | 116.43 |
|                                                                           |                  |            | O1- Fe -O4          | 132.00 |
|                                                                           |                  |            | O2- Fe -O3          | 90.97  |
|                                                                           |                  |            | O2- Fe -O4          | 85.87  |
|                                                                           |                  | O3- Fe -O4 | 110.43              |        |

|                                  |             |      |  |  |
|----------------------------------|-------------|------|--|--|
| <b>H<sub>2</sub>L-TNP adduct</b> | O1(L)--H(O) | 2.10 |  |  |
|----------------------------------|-------------|------|--|--|

**Table S4:** Molecular Orbital, involved the Major Electronic Transitions with Osc. Strength of **H<sub>2</sub>L**, **H<sub>2</sub>L – Al(III) Complex**, **H<sub>2</sub>L – Fe(III) Complex** and **H<sub>2</sub>L-TNP adduct**

| Compounds                             | Wavelength(nm) | Osc. Strength | Electronic Transition |
|---------------------------------------|----------------|---------------|-----------------------|
| <b>H<sub>2</sub>L</b>                 | 340.25         | 0.2127        | H-2(A) – L(A)         |
|                                       | 420.18         | 0.4191        | H(A) – L(A)           |
| <b>H<sub>2</sub>L-Al(III) complex</b> | 360.08         | 0.2783        | H(A) – L(A)           |
|                                       | 445.48         | 0.4987        | H-2(A) – L(A)         |
| <b>H<sub>2</sub>L-Fe(III) complex</b> | 368.29         | 0.0593        | S-1(A) – L(A)         |
|                                       | 470.34         | 0.0518        | S(A) – L+1(A)         |
|                                       | 720.39         | 0.1095        | S-9(A) – L(A)         |
| <b>H<sub>2</sub>L-TNP adduct</b>      | 385.13         | 0.5141        | H(A) – L+3(A)         |

**Table S5:** Measured amount of Al(III) concentration in market-available drug samples along with a comparison with HPLC method

| Sample Name    | Conc. Of H <sub>2</sub> L (μM) | Amount of sample solution taken (ul) | Measured Conc. Of Al(III) (μM) | Average Conc. Of Al(III) (μM) | HPLC Method (μM) |
|----------------|--------------------------------|--------------------------------------|--------------------------------|-------------------------------|------------------|
| <b>Gelusil</b> | 1                              | 100                                  | 0.942                          | 0.942                         | 0.90             |
|                | 1                              | 100                                  | 0.941                          |                               |                  |
|                | 1                              | 100                                  | 0.942                          |                               |                  |
| <b>Diagene</b> | 1                              | 100                                  | 0.789                          | 0.794                         | 0.76             |
|                | 1                              | 100                                  | 0.798                          |                               |                  |
|                | 1                              | 100                                  | 0.795                          |                               |                  |

|                  |   |     |       |       |      |
|------------------|---|-----|-------|-------|------|
| <b>Diovol</b>    | 1 | 100 | 0.536 | 0.535 | 0.51 |
|                  | 1 | 100 | 0.536 |       |      |
|                  | 1 | 100 | 0.534 |       |      |
| <b>Disprin</b>   | 1 | 100 | 0.412 | 0.418 | 0.41 |
|                  | 1 | 100 | 0.420 |       |      |
|                  | 1 | 100 | 0.423 |       |      |
| <b>Nexpro rd</b> | 1 | 100 | 0.205 | 0.207 | 0.22 |
|                  | 1 | 100 | 0.208 |       |      |
|                  | 1 | 100 | 0.209 |       |      |
| <b>Telma</b>     | 1 | 100 | 0.155 | 0.155 | 0.17 |
|                  | 1 | 100 | 0.153 |       |      |
|                  | 1 | 100 | 0.157 |       |      |

## References

1. A Bhattacharyya, S. C. Makhal, and N. Guchhait, *ACS Omega*, 2018, **3**, 11838–11846.
2. V. K. Gupta, S. K. Shoor, L. K. Kumawat, and A. K. Jain, *Sensors Actuators, B Chem.* 2015, **209**, 15–24.
3. R. Patra, and K. K Rajak, *ChemistrySelect*, 2020, **5**, 9477 – 9485.
4. G. M. Khairy, A. S. Amin, S. M. N. Moalla, A. Medhat, and Nader Hassan, *RSC Adv.*, 2022,**12**, 27679-27686.
5. Z. Wu, Z. Xu, H. Tan, X. Li, J. Yan, C. Dong and L. Zhang, *Spectrochim. Acta, Part A*, 2019, **213**, 167 —175.
6. U. D. Kamaci, M. Kamaci, and Aysegul Peksel, *Spectrochimica Acta Part A: Molecular and Biomolecular Spectroscopy*, 2021, **254**, 119650.

7. V. K. Gupta N. Mergu, and L. K. Kumawat, *Sensors and Actuators B*, 2016, **223**, 101 – 113.
8. M, Zhang, L. Gong, C. Sun, W. Li, Z. Chang, and D. Qi, *Spectrochimica Acta Part A: Molecular and Biomolecular Spectroscopy*, 2019, **214**, 07 – 13.
9. R. Gupta, S. S. Malak, V. Kumar and P. Kumar, *New J. Chem.*, 2020, **44**, 13285-13294.
10. S. Das, U. Mukherjee, S. Pal, S. Maitra and P. Sahoo, *Org. Biomol. Chem.*, 2019, **17**, 5230-5233.
11. B. Das, A. Ghosh, D. P. Dorairaj, M. Dolai, R. Karvembu, S. Mabhai, H. Im, S. Dey, and A. Misra, *Journal of Molecular Liquids*, 2022, 354, 118824.
12. S. Das, M. Das, U. K. Das, B. C. Samanta, A. Bag, A. Patra, N. Bhattacharya, T. Maity, *Dyes and Pigments*, 2024, 222, 111884.
13. B. Naskar, A. Bauzá, A. Frontera, D. K. Maiti, C. D. Mukhopadhyay, and S. Goswami, *Dalton Trans.* 2018, **47**, 15907-15916.
14. R. Purkait, A. Dey, S. Dey, P. P. Ray and C. Sinha, *New J. Chem.*, 2019, **43**, 14979-14990.
15. S, Chongdar, U. Mondal, T. Chakraborty, P. Banerjee, and A. Bhaumik, *ACS Appl. Mater. Interfaces* 2023, **15**, 11, 14575–14586.
16. S. Mukherjee, S. Ganguly, A. Chakraborty, A. Mandal, and D. Das, *ACS Sustainable Chem. Eng.* 2019, **7**, 1, 819–830.
17. A. Kathiravan, A. Gowri, T. Khamrang, M. D. Kumar, N. Dhenadhayalan, K. C. Lin, M. Velusamy, and M. Jaccob, *Anal. Chem.* 2019, **91**, 20, 13244–13250.
18. A. Kumar, A. Kumar and S. Pandey, *Dalton Trans.*, 2016, **45**, 8475-8484.
19. A. K. Nandi, S. Mondal, P. Bairi, and Sujoy Das, *Chemistry – A European Journal*, 2018, **24**, 5591 – 5600.
